# Supplementary material
Source: PubMed Central journal article supplement (PMC3114061)
Supplement: supp_183_10_1322__1.pdf [file supp_183_10_1322__1.pdf]

**ONLINE DATA SUPPLEMENT**

**Rig-Like Helicase Innate Immunity Inhibits VEGF Tissue Responses via A Type I  
Interferon-Dependent Mechanism**

Bing Ma, M.D., Charles S. Dela Cruz, M.D., Ph.D, Dominik Hartl M.D., Min-Jong Kang M.D.,  
Ph.D, Shervin Takyar, M.D., Ph.D, Robert J. Homer M.D., Ph.D,  
Chun Geun Lee, M.D., Ph.D and Jack A. Elias, M.D.

A)

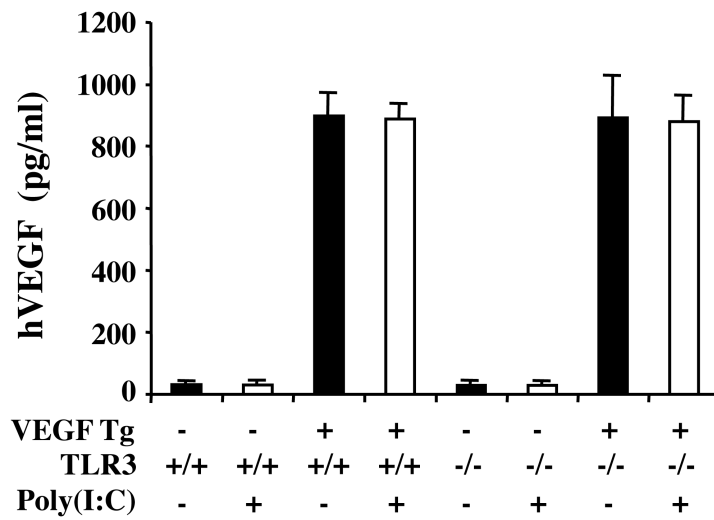

B)

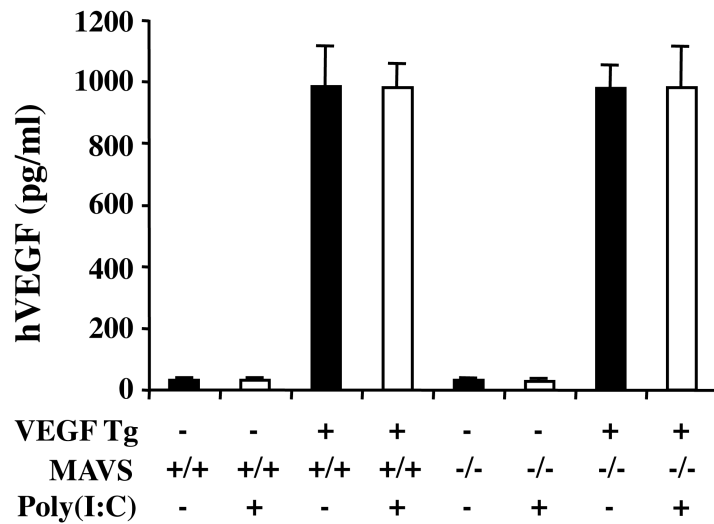

C)

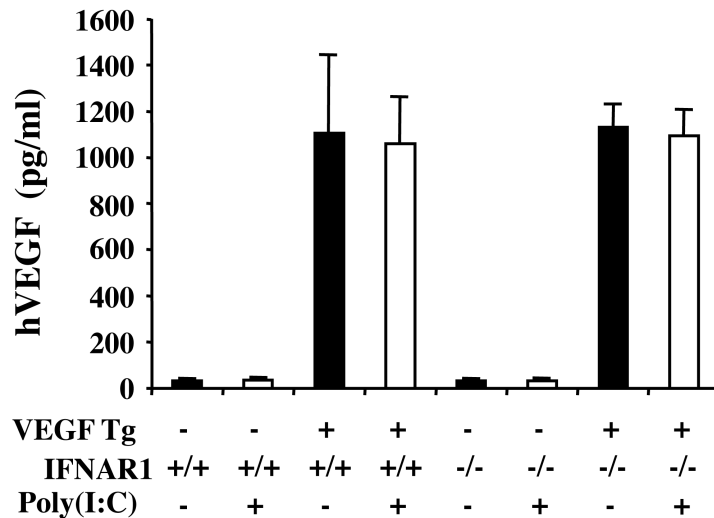

**Supplement Figure 1.** Effects of Poly(I:C) on the production of transgenic VEGF. WT (VEGF<sup>-</sup>) and Tg<sup>+</sup> mice with wild type genetic backgrounds (+/+) or the noted null (-/-) mutations of TLR3, MAVS or IFNAR1 were treated with dox and Poly(I:C)(+) or its vehicle control Poly(I:C)(-) for 2 weeks. The levels of BAL hVEGF were then assessed by ELISA. The noted values represent the mean +/- SEM of a minimum of 4 mice each.

**A)**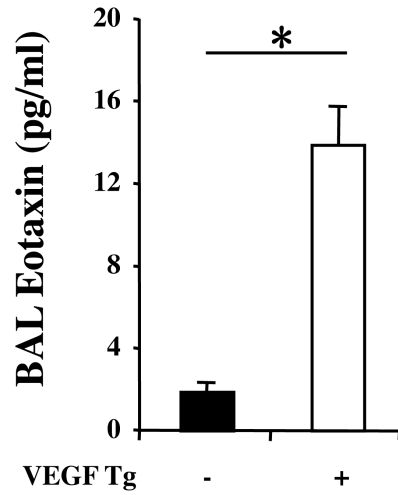**B)**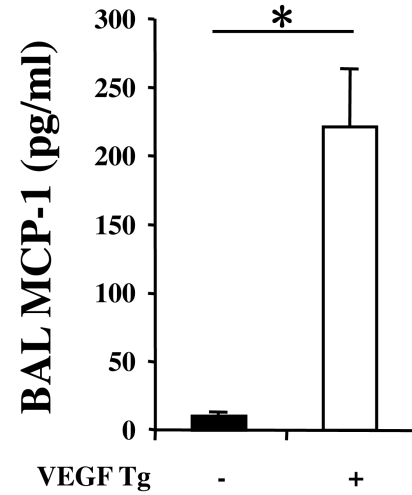**C)**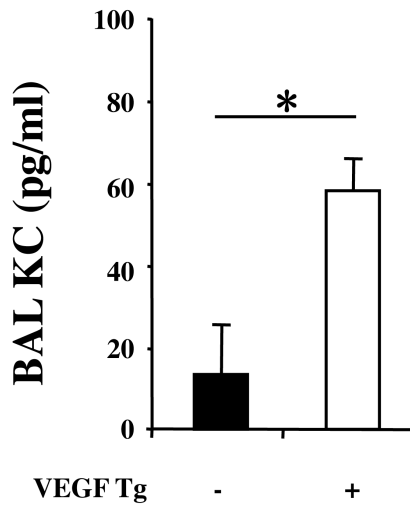**D)**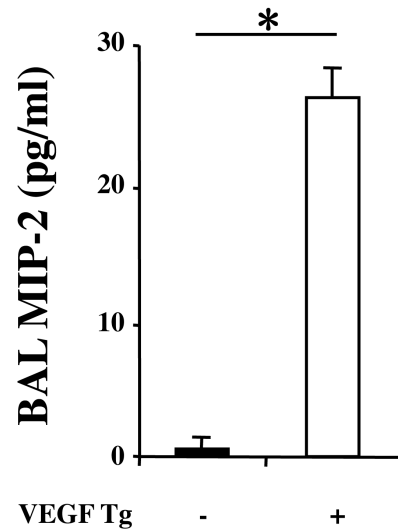

**Supplement Figure 2.** Chemokines in the BAL from VEGF Tg+ mice. WT (VEGF Tg-) and VEGF Tg+ mice were treated with dox for 2 weeks. The levels of the noted chemokines in BAL were evaluated by ELISA. The noted values represent the mean +/- SEM of a minimum of 4 mice. (\*P<0.05)

**A)**

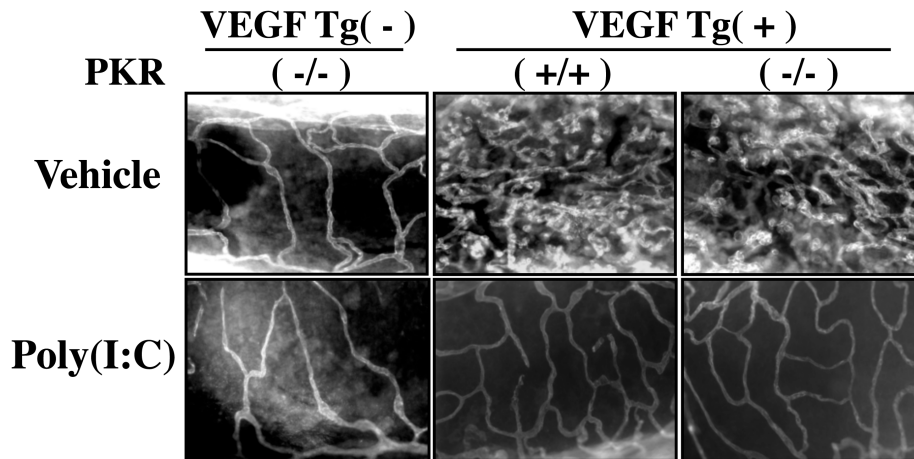

**B)**

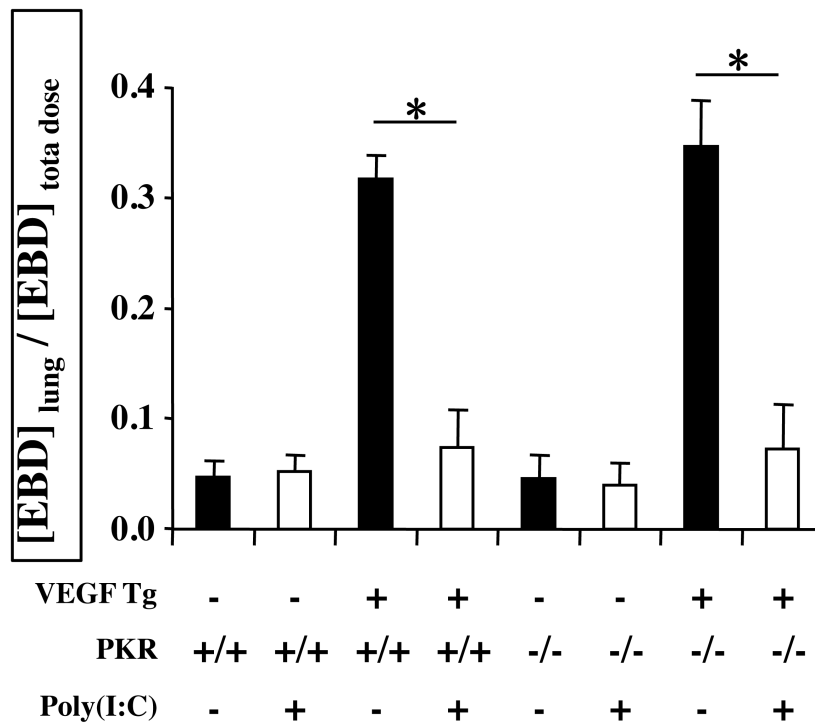

**Supplement Figure 3.** Role of PKR in Poly(I:C) regulation of VEGF responses. WT (VEGF Tg-) and VEGF transgenic (VEGF Tg+) mice were bred with mice with wild type (+/+) or null mutant PKR loci. This generated transgene negative mice with wild type PKR loci (VEGF Tg-/PKR<sup>+/+</sup>), transgene negative mice with null PKR loci (VEGF Tg-/PKR<sup>-/-</sup>), transgenic mice with wild type PKR loci (VEGF Tg+/PKR<sup>+/+</sup>), and transgenic mice with null PKR loci (VEGF Tg+/PKR<sup>-/-</sup>). These mice were treated with Poly(I:C) (30  $\mu$ g) or vehicle (Poly(I:C)-), transgene activation was accomplished with dox 24 hours later, and treatment with Poly(I:C) or vehicle and dox were continued for 2 weeks. Angiogenesis (A) and dye extravasation (B) were assessed.
